# Supplementary material for: Computational Studies to Understand the Neuroprotective Mechanism of Action Basil Compounds
Source: MDPI journal article supplement (doi:10.3390/molecules28207005), 2023-10-10
Supplement: s1 [file s1]

**Table S1.** Chemical constituents from the Basil plant.

| Sr. No | Phytochemicals                 | Chemical Structures                                                                   |
|--------|--------------------------------|---------------------------------------------------------------------------------------|
| 1      | 4-Hydroxybenzoic acid          | 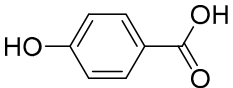   |
| 2      | 18-Hydroxyoctadecadienoic acid |    |
| 3      | Apigenin-7-glycoside           |    |
| 4      | Caffeic acid                   |    |
| 5      | Caffosylglucoside              |   |
| 6      | Caftaric acid                  |  |

|    |                            |                                                                                      |
|----|----------------------------|--------------------------------------------------------------------------------------|
| 7  | Chichoric acid             | 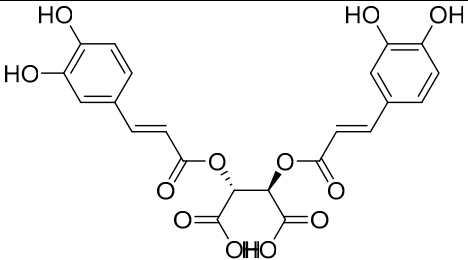  |
| 8  | Dihydroxydimethoxy flavone |   |
| 9  | Dihydroxypalmitic acid     |   |
| 10 | Ellagic acid arabinoside   |  |

|    |                          |                                                                                       |
|----|--------------------------|---------------------------------------------------------------------------------------|
| 11 | Ellagic acid pentoside   | 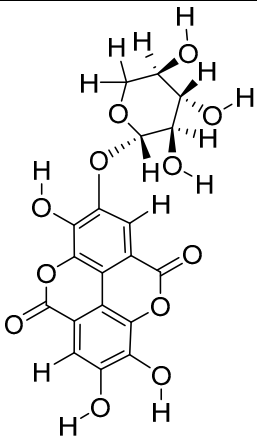   |
| 12 | Feruloyltartaric acid    |    |
| 13 | Glucoliquiritin apioside |   |
| 14 | Hydroxydecadienoic acid  |  |
| 15 | Isomelitrica acid        |  |

|    |                        |                                                                                      |
|----|------------------------|--------------------------------------------------------------------------------------|
| 16 | Isoquercetin           | 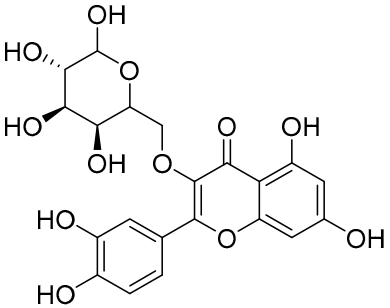  |
| 17 | Kaempferol-o-glucoside |   |
| 18 | Linolenic acid         |   |
| 19 | Lithospermic acid      |  |

|    |                          |                                                                                       |
|----|--------------------------|---------------------------------------------------------------------------------------|
| 20 | Myricerion caffoyl ester | 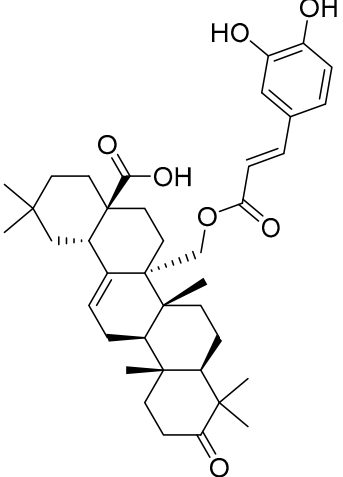   |
| 21 | Octadecanoic acid        |    |
| 22 | Octadecatrienoic acid    |    |
| 23 | Olenoleic acid           |   |
| 24 | Palmitic acid            |  |
| 25 | Quercetin diglucoside    |  |

|    |                           |                                                                                                                                                                                                                                                                                                                                                                                                                                                                                                     |
|----|---------------------------|-----------------------------------------------------------------------------------------------------------------------------------------------------------------------------------------------------------------------------------------------------------------------------------------------------------------------------------------------------------------------------------------------------------------------------------------------------------------------------------------------------|
| 26 | Quercetin                 | 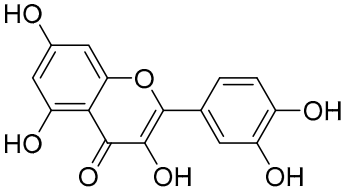 <p>The chemical structure of Quercetin is a flavonoid. It consists of a central chromone ring system. The A-ring (left) has hydroxyl groups at positions 5 and 7. The C-ring (middle) has a ketone at position 4 and a hydroxyl group at position 3. The B-ring (right) is a phenyl ring with hydroxyl groups at positions 3 and 4.</p> <chem>Oc1cc(O)c2c(c1)oc(=O)c(O)c2-c3cc(O)c(O)cc3</chem>                 |
| 27 | Quercetin-3-o-arabinoside |  <p>The chemical structure of Quercetin-3-o-arabinoside shows the Quercetin aglycone linked to an arabinose sugar at the 3-position of the C-ring. The arabinose is in its furanose form, with hydroxyl groups at positions 2, 3, and 4. The linkage is an O-glycosidic bond.</p> <chem>Oc1cc(O)c2c(c1)oc(=O)c(O)c2-c3cc(O)c(O)cc3O[C@H]4O[C@H](CO[C@H]5O[C@H](CO)[C@H](O)[C@H]5O)[C@H](O)[C@H](O)[C@H]4O</chem> |
| 28 | Rosmarinic acid           |  <p>The chemical structure of Rosmarinic acid is a phenolic compound. It features a central chiral carbon atom bonded to a 3,4-dihydroxybenzyl group, a carboxylic acid group, and a 3,4-dihydroxyphenyl group via an ester linkage. The carboxylic acid group is also shown with a hydroxyl group.</p> <chem>Oc1cc(O)c(O)cc1C(=O)O[C@H](Cc2cc(O)c(O)cc2)C(=O)O</chem>                                          |

|    |                             |                                                                                       |
|----|-----------------------------|---------------------------------------------------------------------------------------|
| 29 | Rosmarinic acid-3-glucoside | 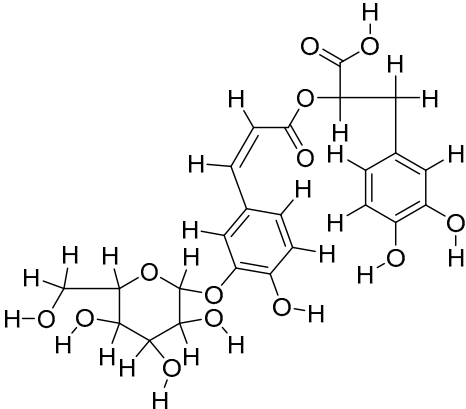   |
| 30 | Rutin                       |   |
| 31 | Salicylic acid              |  |

|    |                            |                                                                                      |
|----|----------------------------|--------------------------------------------------------------------------------------|
| 32 | Salicylic acid glucoside   | 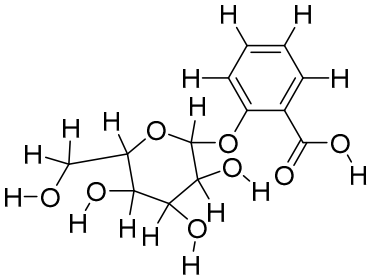  |
| 33 | Salicylic acid-o-glucoside |   |
| 34 | Salvianolic acid           |   |
| 35 | Salvianolic acid           |  |



|    |                                 |                                                                                       |
|----|---------------------------------|---------------------------------------------------------------------------------------|
| 36 | Salvianolic acid C              | 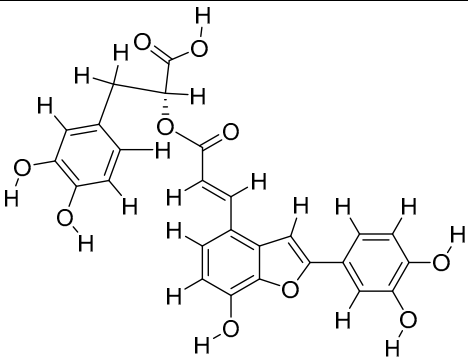   |
| 37 | Salvianolic acid A              |    |
| 38 | Trihydroxy octadecadienoic acid |   |
| 39 | Vicenin                         |  |
| 40 | Carotene                        |  |

|    |                |                                                                                       |
|----|----------------|---------------------------------------------------------------------------------------|
| 41 | Allicin        | 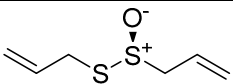   |
| 42 | Aloin          |    |
| 43 | Estragole      |    |
| 44 | Anethole       |    |
| 45 | Sabinene       |    |
| 46 | Eugenol        |   |
| 47 | Eucalyptol     |  |
| 48 | Linalool       |  |
| 49 | Methyl eugenol |  |

|    |                          |                                                                                       |
|----|--------------------------|---------------------------------------------------------------------------------------|
| 50 | Stearic acid             | 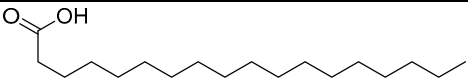   |
| 51 | Arachidonic acid         |    |
| 52 | Lauric acid              |    |
| 53 | Carpic acid              |    |
| 54 | $\alpha$ -Linolenic acid |    |
| 55 | Myristicin               |    |
| 56 | Palmitic acid            |   |
| 57 | Oleic acid               |  |
| 58 | Llinalool                |  |

|    |                  |                                                                                       |
|----|------------------|---------------------------------------------------------------------------------------|
| 59 | Limonene         | 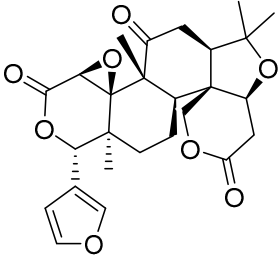   |
| 60 | Methyl chavicol  |    |
| 61 | $\beta$ -Pinene  |    |
| 62 | $\alpha$ -Pinene |    |
| 63 | Palmatine        |   |
| 64 | Chlorogenic acid |  |

|    |                  |                                                                                       |
|----|------------------|---------------------------------------------------------------------------------------|
| 65 | Apigenin         | 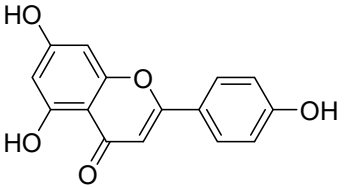   |
| 66 | Borneol          |    |
| 67 | o-Cyminate       |    |
| 68 | Cinnamylacetate  |    |
| 69 | Eugenol          |    |
| 70 | Geraneol         |    |
| 71 | B-Caryphyllone   |   |
| 72 | $\beta$ -elemene |  |
| 73 | Linalool         |  |

|    |                          |                                                                                      |
|----|--------------------------|--------------------------------------------------------------------------------------|
| 74 | Apigenin-7,4-diglucoside | 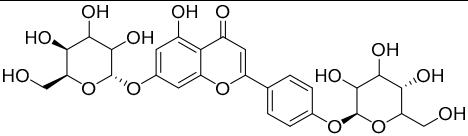  |
| 75 | methyl cinnamate         |   |
| 76 | 1,8-cineole              |   |
| 77 | Methyl eugenol           |   |
| 78 | beta-sitosterol          |   |
| 79 | Tannin                   |  |

|    |                              |                                                                                       |
|----|------------------------------|---------------------------------------------------------------------------------------|
| 80 | ferusoylglucoside            | 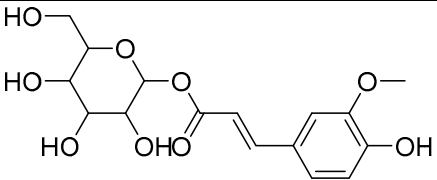   |
| 81 | Myricetin 3-neohesperidoside |    |
| 82 | Steric acid                  |    |
| 83 | Beta-carotene                |    |
| 84 | Vicine                       |   |
| 85 | Vitamin K                    |  |

|    |              |                                                                                       |
|----|--------------|---------------------------------------------------------------------------------------|
| 86 | Vitamin C    | 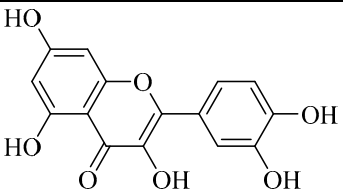   |
| 87 | Orientin     |    |
| 88 | Cineole      |    |
| 89 | Eugenol      |    |
| 90 | Alpha pinene |   |
| 91 | Amyrin       |  |
| 92 | Antheole     |  |



|    |                    |                                                                                      |
|----|--------------------|--------------------------------------------------------------------------------------|
| 93 | Anthocyanin        | 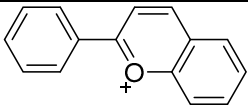  |
| 94 | Apigenin           |   |
| 95 | Beta Cryptoxanthin |                                                                                      |
| 96 | Betulin            |   |
| 97 | Betulinic Acid     |  |

|     |                |                                                                                       |
|-----|----------------|---------------------------------------------------------------------------------------|
| 98  | Boswellic acid | 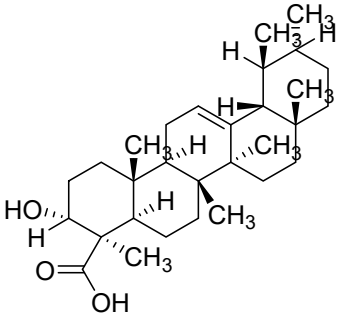   |
| 99  | Campesterol    |    |
| 100 | Camphene       |    |
| 101 | Candicine      |   |
| 102 | car-3-ene      |  |

|     |                      |                                                                                                                                                                                                                                                                                                                                                                                                                            |
|-----|----------------------|----------------------------------------------------------------------------------------------------------------------------------------------------------------------------------------------------------------------------------------------------------------------------------------------------------------------------------------------------------------------------------------------------------------------------|
| 103 | Carboxyatractyloside | 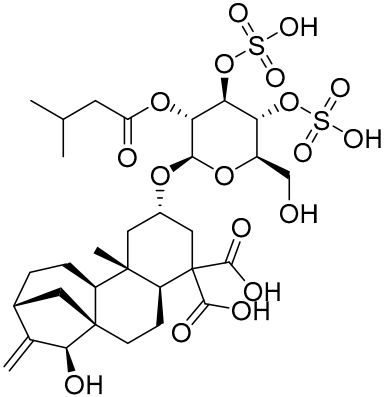 <p>The structure of Carboxyatractyloside consists of a tricyclic aglycone (atractyloside) linked via an ether bond to a disulfate sugar moiety. The sugar is a hexose with a disulfate group at C2 and a carboxylate group at C6. The aglycone has a methyl group at C13, a hydroxyl group at C14, and a carboxylate group at C15.</p> |
| 104 | Catechol             |  <p>The structure of Catechol is a benzene ring with two adjacent hydroxyl groups at positions 1 and 2.</p>                                                                                                                                                                                                                             |
| 105 | Chebulagic Acid      |  <p>The structure of Chebulagic Acid is a complex polycyclic molecule with multiple hydroxyl groups and a carboxylic acid group. It features a central core with several fused and linked rings, including a cyclohexene ring and a carboxylic acid group.</p>                                                                         |
| 106 | Chebulic Acid        |  <p>The structure of Chebulic Acid is a complex polycyclic molecule with multiple hydroxyl groups and a carboxylic acid group. It features a central core with several fused and linked rings, including a cyclohexene ring and a carboxylic acid group.</p>                                                                          |

|     |                             |                                                                                       |
|-----|-----------------------------|---------------------------------------------------------------------------------------|
| 107 | Chrysophenol                | 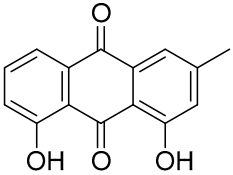   |
| 108 | Cyanidine-3-rhamnoglucoside |    |
| 109 | Ellagitannin                |   |
| 110 | Emodin                      |  |

|     |               |                                                                                                                            |
|-----|---------------|----------------------------------------------------------------------------------------------------------------------------|
| 111 | Ethyl Gallate | 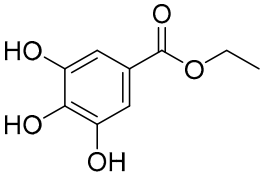 <chem>CCOC(=O)c1cc(O)c(O)c(O)c1</chem> |
| 112 | Galactomannan |                                         |
| 113 | Gallotannin   |                                        |

|     |                   |                                                                                       |
|-----|-------------------|---------------------------------------------------------------------------------------|
| 114 | Glycyrrhizic Acid | 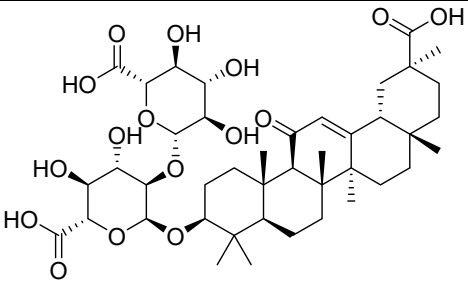   |
| 115 | Glycyrol          |    |
| 116 | Hydroxycinnamic   |    |
| 117 | Isomahanine       |   |
| 118 | Isomethone        |  |

|     |                  |                                                                                     |
|-----|------------------|-------------------------------------------------------------------------------------|
| 119 | Isorientin       | 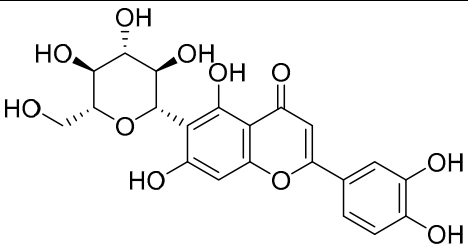 |
| 120 | Isorhamnetin     |  |
| 121 | limonene         |  |
| 122 | linalool acetate |  |
